# Supplementary material
Source: HighWire-hosted journal article supplement (https://erj.ersjournals.com/content/50/5/1700014)
Supplement: inline-supplementary-material-1 [file inline-supplementary-material-1.pdf]

**Table S1 : Questions used to assess severity of wheeze and definition of severity indicators**

| ALSPAC                                                                                                                                                                                                                                                                                                                                                                                                                                                                                                                                                                                                                                                                                                                                                                                                                                                                                                                                                                                                                                                                                                                                             | LRC                                                                                                                                                                                                                                                                                                                                                                                                                                                                                                                                                                                                                                                                                                                                                                                                                                                                                                                                                                                            |
|----------------------------------------------------------------------------------------------------------------------------------------------------------------------------------------------------------------------------------------------------------------------------------------------------------------------------------------------------------------------------------------------------------------------------------------------------------------------------------------------------------------------------------------------------------------------------------------------------------------------------------------------------------------------------------------------------------------------------------------------------------------------------------------------------------------------------------------------------------------------------------------------------------------------------------------------------------------------------------------------------------------------------------------------------------------------------------------------------------------------------------------------------|------------------------------------------------------------------------------------------------------------------------------------------------------------------------------------------------------------------------------------------------------------------------------------------------------------------------------------------------------------------------------------------------------------------------------------------------------------------------------------------------------------------------------------------------------------------------------------------------------------------------------------------------------------------------------------------------------------------------------------------------------------------------------------------------------------------------------------------------------------------------------------------------------------------------------------------------------------------------------------------------|
| <p><b>Wheeze severity:</b></p> <p>1) In the past year has she/he had any periods when there was wheezing with whistling on his chest when he breathed?</p> <ul style="list-style-type: none"> <li>i. Yes</li> <li>ii. No</li> </ul> <p>b. How many separate times has this happened in the past 12 months?</p> <ul style="list-style-type: none"> <li>i. Once</li> <li>ii. Twice</li> <li>iii. 3-4 times</li> <li>iv. 5 or more times</li> </ul> <p>c. Was she/he breathless during any of these times?</p> <ul style="list-style-type: none"> <li>i. Yes for all</li> <li>ii. Yes for some</li> <li>iii. No not at all</li> </ul> <p>d. How often, on average, has your child's sleep been disturbed due to wheezing in the past 12 months?</p> <ul style="list-style-type: none"> <li>i. Never woken with wheezing</li> <li>ii. Less than one night per week</li> <li>iii. One or more nights per week</li> </ul> <p>e. Has wheezing ever been severe enough to limit your child's speech to only one or two words at a time between breaths in the past 12 months?</p> <ul style="list-style-type: none"> <li>i. Yes</li> <li>ii. No</li> </ul> | <p><b>Wheeze severity:</b></p> <p>1) How many attacks of wheezing has your child had during the last 12 months?</p> <ul style="list-style-type: none"> <li>i. None</li> <li>ii. 1 to 3</li> <li>iii. 4 to 12</li> <li>iv. More than 12</li> </ul> <p>2) Do these attacks cause him/her to be short of breath? (only asked in 1999)</p> <ul style="list-style-type: none"> <li>i. Yes, always</li> <li>ii. Yes, occasionally</li> <li>iii. No, never</li> </ul> <p>3) In the last 12 months, how often, on average, has your child's sleep been disturbed due to wheezing?</p> <ul style="list-style-type: none"> <li>i. Never woken with wheezing</li> <li>ii. Less than one night per week</li> <li>iii. One or more nights per week</li> </ul> <p>4) In the last 12 months, how much did wheezing interfere with your child's daily activities?</p> <ul style="list-style-type: none"> <li>i. Not at all</li> <li>ii. A little</li> <li>iii. A moderate amount</li> <li>iv. A lot</li> </ul> |
| <p><b>Definition of severity indicators:</b></p> <p>Frequent attacks: 1.b.iii or 1.b.iv (<math>\geq 3</math> attacks)</p> <p>Shortness of breath: 1.c.i or 1.c.ii</p>                                                                                                                                                                                                                                                                                                                                                                                                                                                                                                                                                                                                                                                                                                                                                                                                                                                                                                                                                                              | <p><b>Definition of severity indicators:</b></p> <p>Frequent attacks: 1. iii or 1.iv (<math>\geq 4</math> attacks)</p> <p>Shortness of breath: 2.i or 2.ii</p>                                                                                                                                                                                                                                                                                                                                                                                                                                                                                                                                                                                                                                                                                                                                                                                                                                 |

|                                                                  |                                                                                        |
|------------------------------------------------------------------|----------------------------------------------------------------------------------------|
| Sleep disturbance: 1.d.ii or 1.d.iii<br>Speech limitation: 1.e.i | Sleep disturbance: 3.ii or 3.iii<br>Interference with activities: 4.ii, 4.iii, or 4.iv |
|------------------------------------------------------------------|----------------------------------------------------------------------------------------|
