# Supplementary material
Source: HighWire-hosted journal article supplement (https://erj.ersjournals.com/content/50/5/1700014)
Supplement: inline-supplementary-material-2 [file inline-supplementary-material-2.pdf]

**Table S2: Characteristics of children excluded and included from analyses**

| Characteristics                   | Not included in analyses |      | Included in analyses* |      |                |      | P      |
|-----------------------------------|--------------------------|------|-----------------------|------|----------------|------|--------|
|                                   | No surveys               |      | 1-2 surveys†          |      | All 3 surveys‡ |      |        |
|                                   | n/N                      | %    | n/N                   | %    | n/N            | %    |        |
| <b>ALSPAC</b>                     | <b>N=2950</b>            |      | <b>N=3641</b>         |      | <b>N=7468</b>  |      |        |
| Sex male                          | 1506/2938                | 51.3 | 1916/3641             | 52.6 | 3844/7468      | 51.5 | 0.445  |
| Ethnicity white                   | 1689/1863                | 90.7 | 3174/3329             | 95.3 | 7181/7344      | 97.8 | <0.001 |
| Maternal smoking during pregnancy | 979/2539                 | 38.6 | 1149/3553             | 32.3 | 1542/7445      | 20.7 | <0.001 |
| Older siblings (≥1)               | 374/620                  | 60.3 | 1805/3062             | 58.9 | 3973/7212      | 55.1 | <0.001 |
| Crowding, >1 person/room          | 177/480                  | 36.9 | 822/2619              | 31.4 | 1480/6823      | 21.7 | <0.001 |
| Pet ownership                     | 283/495                  | 57.2 | 1599/2745             | 58.3 | 3894/7101      | 54.8 | 0.008  |
| <b>LRC</b>                        | <b>N=1037</b>            |      | <b>N=1843</b>         |      | <b>N=1420</b>  |      |        |
| Sex male                          | 531/1037                 | 51.2 | 928/1843              | 50.4 | 764/1420       | 53.8 | 0.138  |
| Ethnicity white                   | 739/1037                 | 71.3 | 1494/1843             | 81.1 | 1267/1420      | 89.2 | <0.001 |
| Maternal smoking during pregnancy | 138/457                  | 30.2 | 300/1474              | 20.4 | 160/1391       | 11.5 | <0.001 |
| Older siblings (≥1)               | 315/453                  | 69.5 | 968/1437              | 67.4 | 869/1361       | 63.9 | 0.039  |
| Crowding, >1 person/room          | 253/464                  | 54.5 | 666/1472              | 45.2 | 484/1380       | 35.1 | <0.001 |
| Pet ownership                     | 173/466                  | 37.1 | 623/1495              | 41.7 | 603/1408       | 42.8 | 0.095  |

Abbreviations: ALSPAC Avon Longitudinal Study on Parents and Children, LRC Leicestershire Respiratory Cohort 1998-b

\* Information on wheeze from at least on survey at age 2, 4, or 6 years

† Number of surveys (age 2, 4, or 6 years) from which information on wheeze was available

‡ P-values from  $\chi^2$ -tests
