# Supplementary material
Source: HighWire-hosted journal article supplement (https://erj.ersjournals.com/content/50/5/1700014)
Supplement: inline-supplementary-material-3 [file inline-supplementary-material-3.pdf]

**Table S3: Characteristics of children at age 2 years according to phenotype of wheeze**

| Characteristics                   | EVW          |      | MTW          |      | NCW          |      | P*     |
|-----------------------------------|--------------|------|--------------|------|--------------|------|--------|
|                                   | n/N          | %    | n/N          | %    | n/N          | %    |        |
| <b>ALSPAC</b>                     | <b>N=752</b> |      | <b>N=928</b> |      | <b>N=122</b> |      |        |
| Sex male                          | 440/752      | 58.5 | 559/928      | 60.2 | 70/122       | 57.4 | 0.698  |
| Ethnicity white                   | 724/734      | 98.6 | 844/884      | 95.5 | 114/116      | 98.3 | <0.001 |
| Maternal smoking during pregnancy | 192/749      | 25.6 | 298/915      | 32.6 | 43/121       | 35.5 | 0.003  |
| Older siblings ( $\geq 1$ )       | 439/708      | 62.0 | 522/850      | 61.4 | 64/111       | 57.7 | 0.682  |
| Crowding, >1 person/room          | 144/655      | 22.0 | 251/799      | 31.4 | 45/98        | 45.9 | <0.001 |
| Pet ownership                     | 395/682      | 57.9 | 479/832      | 57.6 | 51/103       | 49.5 | 0.262  |
| <b>LRC</b>                        | <b>N=229</b> |      | <b>N=295</b> |      | <b>N=9</b>   |      |        |
| Sex male                          | 134/229      | 58.5 | 181/295      | 61.4 | 2/9          | 22.2 | 0.058  |
| Ethnicity white                   | 203/229      | 88.6 | 259/295      | 87.8 | 8/9          | 88.9 | 0.954  |
| Maternal smoking during pregnancy | 35/220       | 15.9 | 69/292       | 23.6 | 2/9          | 22.2 | 0.099  |
| Older siblings ( $\geq 1$ )       | 145/217      | 66.8 | 192/283      | 67.8 | 6/9          | 66.7 | 0.970  |
| Crowding, >1 person/room          | 95/222       | 42.8 | 135/286      | 47.2 | 4/9          | 44.4 | 0.612  |
| Pet ownership                     | 98/227       | 43.2 | 107/293      | 36.5 | 2/9          | 22.2 | 0.176  |

Abbreviations: ALSPAC Avon Longitudinal Study on Parents and Children, LRC Leicestershire Respiratory Cohort 1998-b, EVW episodic viral wheeze, MTW multiple trigger wheeze, NCW Non-classifiable wheeze

\* P-values from  $\chi^2$ -tests
