# Supplementary material
Source: HighWire-hosted journal article supplement (https://erj.ersjournals.com/content/50/5/1700014)
Supplement: inline-supplementary-material-4 [file inline-supplementary-material-4.pdf]

**Table S4: Association between wheeze phenotypes and wheeze 2 years later**

| Age at<br>Baseline<br>(years) | Age at<br>Follow-up<br>(years) | Phenotype at<br>baseline | n (%)      | Current wheeze at follow up<br>Crude OR (95% CI) | Adj. OR* (95%<br>CI) |
|-------------------------------|--------------------------------|--------------------------|------------|--------------------------------------------------|----------------------|
| ALSPAC                        |                                |                          |            |                                                  |                      |
| 2                             | 4                              | No wheeze                | 681 (10.3) | 1                                                | 1                    |
|                               |                                | EVW                      | 301 (47.2) | 7.8 (6.5, 9.3)                                   | 3.7 (2.9, 4.6)       |
|                               |                                | MTW                      | 448 (59.0) | 12.5 (10.6, 14.8)                                | 4.4 (3.5, 5.7)       |
| 4                             | 6                              | No wheeze                | 348 (5.4)  | 1                                                | 1                    |
|                               |                                | EVW                      | 179 (40.6) | 11.9 (9.5, 14.8)                                 | 3.4 (2.5, 4.7)       |
|                               |                                | MTW                      | 435 (60.7) | 26.6 (22.2, 32.1)                                | 4.9 (3.5, 6.8)       |
| LRC                           |                                |                          |            |                                                  |                      |
| 2                             | 4                              | No wheeze                | 163 (11.1) | 1                                                | 1                    |
|                               |                                | EVW                      | 56 (31.8)  | 3.7 (2.6, 5.3)                                   | 2.5 (1.6, 3.9)       |
|                               |                                | MTW                      | 120 (55.3) | 9.9 (7.2, 13.5)                                  | 4.0 (2.3, 7.1)       |
| 4                             | 6                              | No wheeze                | 101 (6.9)  | 1                                                | 1                    |
|                               |                                | EVW                      | 36 (37.5)  | 8.1 (5.1, 12.8)                                  | 7.0 (4.1, 12.0)      |
|                               |                                | MTW                      | 131 (61.5) | 21.5 (15.3, 30.3)                                | 13.6 (7.7, 24.0)     |

Abbreviations: ALSPAC Avon Longitudinal Study on Parents and Children, LRC Leicestershire Respiratory Cohort 1998-b, EVW episodic viral wheeze, MTW multiple trigger wheeze

\* Adjusted for symptom severity at baseline (frequent attacks, shortness of breath, sleep disturbance, interference with activities and speech limitation)
