# Supplementary material
Source: HighWire-hosted journal article supplement (https://erj.ersjournals.com/content/50/5/1700014)
Supplement: inline-supplementary-material-5 [file inline-supplementary-material-5.pdf]

**Table S5: Association between wheeze phenotypes at baseline and 2-year follow-up**

| Age at baseline (years) | Age at follow-up (years) | Phenotype at baseline | N* (100 %) | No wheeze at follow-up n (%) | n (%)      | EVW at follow-up                |                                 | n (%)      | MTW at follow-up                 |                               |
|-------------------------|--------------------------|-----------------------|------------|------------------------------|------------|---------------------------------|---------------------------------|------------|----------------------------------|-------------------------------|
|                         |                          |                       |            |                              |            | Crude RRR <sup>†</sup> (95% CI) | Adj. RRR <sup>†‡</sup> (95% CI) |            | Crude RRR <sup>†‡</sup> (95% CI) | Adj RRR <sup>†</sup> (95% CI) |
| <b>ALSPAC</b>           |                          |                       |            |                              |            |                                 |                                 |            |                                  |                               |
| 2                       | 4                        | No wheeze             | 6465       | 5934 (91.8)                  | 237 (3.7)  | 1                               | 1                               | 294 (4.6)  | 1                                | 1                             |
|                         |                          | EVW                   | 591        | 337 (57.0)                   | 126 (21.3) | 9.4 (7.4, 11.9)                 | 4.6 (3.3, 6.4)                  | 128 (21.7) | 7.7 (6.1, 9.7)                   | 3.2 (2.3, 4.3)                |
|                         |                          | MTW                   | 699        | 311 (44.5)                   | 73 (10.4)  | 5.9 (4.4, 7.8)                  | 2.2 (1.5, 3.3)                  | 315 (45.1) | 20.5 (16.8, 24.8)                | 6.2 (4.6, 8.4)                |
| 4                       | 6                        | No wheeze             | 6271       | 6057 (96.6)                  | 79 (1.3)   | 1                               | 1                               | 135 (2.2)  | 1                                | 1                             |
|                         |                          | EVW                   | 392        | 262 (66.8)                   | 79 (20.2)  | 23.1 (16.5, 32.3)               | 8.0 (4.9, 13.1)                 | 51 (13.0)  | 8.7 (6.2, 12.3)                  | 2.0 (1.2, 3.3)                |
|                         |                          | MTW                   | 616        | 282 (45.8)                   | 52 (8.4)   | 14.1 (9.8, 20.5)                | 3.3 (1.9, 6.0)                  | 282 (45.8) | 44.9 (35.4, 56.9)                | 6.7 (4.3, 10.4)               |
| <b>LRC</b>              |                          |                       |            |                              |            |                                 |                                 |            |                                  |                               |
| 2                       | 4                        | No wheeze             | 1461       | 1301 (89.1)                  | 60 (4.1)   | 1                               | 1                               | 100 (6.8)  | 1                                | 1                             |
|                         |                          | EVW                   | 176        | 120 (68.2)                   | 27 (15.3)  | 4.9 (3.0, 8.0)                  | 4.1 (2.2, 7.5)                  | 29 (16.5)  | 3.1 (2.0, 4.9)                   | 1.8 (1.0, 3.2)                |
|                         |                          | MTW                   | 216        | 97 (44.9)                    | 23 (10.7)  | 5.1 (3.0, 8.7)                  | 3.3 (1.4, 7.7)                  | 96 (44.4)  | 12.9 (9.1, 18.2)                 | 4.1 (2.1, 7.9)                |
| 4                       | 6                        | No wheeze             | 1459       | 1360 (93.2)                  | 28 (1.9)   | 1                               | 1                               | 71 (4.9)   | 1                                | 1                             |
|                         |                          | EVW                   | 95         | 60 (63.2)                    | 19 (20.0)  | 15.4 (8.1, 29.1)                | 15.5 (7.3, 32.9)                | 16 (16.8)  | 5.1 (2.8, 9.3)                   | 4.0 (2.0, 8.0)                |
|                         |                          | MTW                   | 213        | 82 (38.5)                    | 14 (6.6)   | 8.3 (4.2, 16.4)                 | 7.0 (2.6, 18.9)                 | 117 (54.9) | 27.3 (18.9, 39.6)                | 15.6 (8.3, 29.2)              |

Abbreviations: ALSPAC Avon Longitudinal Study on Parents and Children, LRC Leicestershire Respiratory Cohort 1998-b, EVW episodic viral wheeze, MTW multiple trigger wheeze, RRR relative risk ratio

\* Numbers include only children with classifiable wheeze (see Table 1) or no wheeze at baseline and follow-up

<sup>†</sup> Results from multinomial regression analysis including non-classifiable wheeze (see Table 1) but results for this category are not reported here.

<sup>‡</sup> Adjusted for symptom severity at baseline (frequent attacks, shortness of breath, sleep disturbance, interference with activities and speech limitation).
