# Supplementary material
Source: HighWire-hosted journal article supplement (https://erj.ersjournals.com/content/50/5/1700014)
Supplement: inline-supplementary-material-6 [file inline-supplementary-material-6.pdf]

**Table S6: Association between wheeze phenotypes at age 2 and wheeze at age 6 years**

| Phenotype at<br>baseline | Current wheeze at follow up |                      |                      |
|--------------------------|-----------------------------|----------------------|----------------------|
|                          | n (%)                       | Crude OR<br>(95% CI) | Adj. OR* (95%<br>CI) |
| <b>ALSPAC</b>            |                             |                      |                      |
| No wheeze                | 461 (7.7)                   | 1                    | 1                    |
| EVW                      | 177 (30.5)                  | 5.3 (4.3, 6.4)       | 2.4 (1.9, 3.2)       |
| MTW                      | 277 (42.3)                  | 8.8 (7.3, 10.6)      | 2.9 (2.2, 3.9)       |
| <b>LRC</b>               |                             |                      |                      |
| No wheeze                | 105 (8.6)                   | 1                    | 1                    |
| EVW                      | 44 (28.2)                   | 4.2 (2.8, 6.2)       | 2.4 (1.4, 4.0)       |
| MTW                      | 78 (42.6)                   | 7.9 (5.5, 11.2)      | 3.0 (1.5, 5.8)       |

Abbreviations: ALSPAC Avon Longitudinal Study on Parents and Children, LRC Leicestershire Respiratory Cohort 1998-b, EVW episodic viral wheeze, MTW multiple trigger wheeze

\* Adjusted for symptom severity at baseline (frequent attacks, shortness of breath, sleep disturbance, interference with activities and speech limitation)
