# Supplementary material
Source: HighWire-hosted journal article supplement (https://erj.ersjournals.com/content/50/5/1700014)
Supplement: inline-supplementary-material-7 [file inline-supplementary-material-7.pdf]

**Table S7: Association between wheeze phenotypes at age 2 and age 6 years**

| Phenotype   | N*      | No wheeze at | EVW at follow-up |                 |                 | MTW at follow-up |                  |                |
|-------------|---------|--------------|------------------|-----------------|-----------------|------------------|------------------|----------------|
| at baseline | (100 %) | follow-up    | n (%)            | Crude RRR†      | Adj. RRR†‡      | n (%)            | Crude RRR†       | Adj. RRR†‡     |
|             |         | n (%)        |                  | (95% CI)        | (95% CI)        |                  | (95% CI)         | (95% CI)       |
| ALSPAC      |         |              |                  |                 |                 |                  |                  |                |
| No wheeze   | 5854    | 5539 (94.6)  | 108 (1.8)        | 1               | 1               | 207 (3.5)        | 1                | 1              |
| EVW         | 532     | 403 (75.8)   | 63 (11.8)        | 8.0 (5.8, 11.1) | 3.2 (2.0, 5.2)  | 66 (12.4)        | 4.4 (3.3, 5.9)   | 1.7 (1.2, 2.6) |
| MTW         | 585     | 378 (64.6)   | 34 (5.8)         | 4.6 (3.1, 6.9)  | 1.3 (0.7, 2.4)  | 173 (29.6)       | 12.2 (9.8, 15.4) | 3.4 (2.3, 5.1) |
| LRC         |         |              |                  |                 |                 |                  |                  |                |
| No wheeze   | 1212    | 1111 (91.7)  | 28 (2.3)         | 1               | 1               | 73 (6.0)         | 1                | 1              |
| EVW         | 156     | 112 (71.8)   | 22 (14.1)        | 7.8 (4.3, 14.1) | 4.6 (2.0, 10.3) | 22 (14.1)        | 3.0 (1.8, 5.0)   | 1.6 (0.8, 3.2) |
| MTW         | 183     | 105 (57.4)   | 8 (4.4)          | 3.0 (1.3, 6.8)  | 1.4 (0.4, 4.9)  | 70 (38.2)        | 10.1 (6.9, 14.9) | 3.6 (1.7, 7.7) |

Abbreviations: ALSPAC Avon Longitudinal Study on Parents and Children, LRC Leicestershire Respiratory Cohort 1998-b, EVW episodic viral wheeze, MTW multiple trigger wheeze

\* Numbers include only children with classifiable wheeze (see Table 1) or no wheeze at baseline and follow-up

† Results from multinomial regression analysis including non-classifiable wheeze (see Table 1) but results for this category are not reported here.

‡ Adjusted symptom severity at baseline (frequent attacks, shortness of breath, sleep disturbance, interference with activities and speech limitation).
