# Supplementary material
Source: HighWire-hosted journal article supplement (https://erj.ersjournals.com/content/50/5/1700014)
Supplement: inline-supplementary-material-8 [file inline-supplementary-material-8.pdf]

**Table S8: Association between the indirect classification of wheeze phenotypes used in analyses, and parent's direct classification\* into episodic and chronic wheeze in the LRC at age 6 years**

| MTW and EVW<br>defined as in<br>Table 1. | Episodic wheeze* |         | Chronic<br>wheeze* |       | Total |       | P-value                |
|------------------------------------------|------------------|---------|--------------------|-------|-------|-------|------------------------|
|                                          | n                | (Row %) | n                  | Row % | n     | Row % | Fisher's<br>exact test |
| Wheeze at 2 years                        |                  |         |                    |       |       |       |                        |
| EVW                                      | 226              | (99)    | 3                  | (1)   | 229   | (100) | <0.001                 |
| MTW                                      | 222              | (77)    | 68                 | (23)  | 290   | (100) |                        |
| Wheeze at 4 years                        |                  |         |                    |       |       |       |                        |
| EVW                                      | 153              | (99)    | 2                  | (1)   | 155   | (100) | <0.001                 |
| MTW                                      | 267              | (80)    | 68                 | (20)  | 335   | (100) |                        |
| Wheeze at 6 years                        |                  |         |                    |       |       |       |                        |
| EVW                                      | 76               | (97)    | 2                  | (3)   | 78    | (100) | <0.001                 |
| MTW                                      | 189              | (78)    | 52                 | (22)  | 241   | (100) |                        |

\* Based on parents' response to the following questions: "Which of these two descriptions fits best your child's wheeze? 1) My child has only short attacks of wheeze, for example with colds. In between these attacks, he/she does not normally wheeze. 2) My child wheezes always or a lot of the time. With colds he/she has attacks with more severe wheeze". Episodic and chronic wheeze are defined as responses 1 and 2 respectively.
