# Supplementary material
Source: HighWire-hosted journal article supplement (https://erj.ersjournals.com/content/50/5/1700014)
Supplement: inline-supplementary-material-9 [file inline-supplementary-material-9.pdf]

**Table S9: Studies on the stability of EVW and MTW**

| Study                                                                         | Study population, age at baseline                  | Follow-up period | Phenotype definition                                                                                                             | Baseline | Phenotype at follow-up* |           |           | Percentage among children with wheeze at follow-up† |          |
|-------------------------------------------------------------------------------|----------------------------------------------------|------------------|----------------------------------------------------------------------------------------------------------------------------------|----------|-------------------------|-----------|-----------|-----------------------------------------------------|----------|
|                                                                               |                                                    |                  |                                                                                                                                  | N        | no wheeze n (%)         | EVW n (%) | MTW n (%) | EVW %                                               | MTW %    |
| Studies on the stability of EVW (N = number of children with EVW at baseline) |                                                    |                  |                                                                                                                                  |          |                         |           |           |                                                     |          |
| Present study                                                                 |                                                    | 2 years          |                                                                                                                                  |          |                         |           |           |                                                     |          |
| ALSPAC 2-4 years                                                              | Population-based cohorts, 2.5 years                |                  | EVW: Wheeze triggered by infection or bronchitis<br><br>MTW: Wheeze triggered by smoke, weather, allergens, air pollution, other | 591      | 337 (57)                | 126 (21)  | 128 (22)  | 126 (50)                                            | 128 (50) |
| ALSPAC 4-6 years                                                              |                                                    |                  |                                                                                                                                  | 392      | 262 (67)                | 79 (20)   | 51 (13)   | 79 (61)                                             | 51 (39)  |
| LRC 2-4 years                                                                 | Population-based cohorts, 2 years                  |                  | EVW: Wheeze during or soon after a cold.<br>MTW: Wheeze without cold and wheeze triggered by ecercise, excitement, allergens     | 176      | 120 (68)                | 27 (15)   | 29 (17)   | 27 (48)                                             | 29 (52)  |
| LRC 4-6 years                                                                 |                                                    |                  |                                                                                                                                  | 95       | 60 (63)                 | 19 (20)   | 16 (17)   | 19 (54)                                             | 16 (46)  |
| Kapelle 2012 <sup>1</sup>                                                     | Treated for wheeze at hospital, 1.9 years (median) | Min. 2 years     | EVW: Wheeze only during viral colds. MTW: Wheeze during viral colds as well as smoke, fog or allergens.                          | 78       | 36 (47)                 | 23 (29)   | 19 (24)   | 23 (55)                                             | 19 (45)  |
| Topal 2013 <sup>2</sup>                                                       | Children hospitalized for wheeze, 2 years (median) | 20 months        | EVW: Wheeze only by infections, no wheeze between.<br><br>MTW: Wheeze triggered by colds as well as                              | 236      | 91 (38)                 | 108 (46)  | 37 (16)   | 108 (74)                                            | 37(26)   |

|                                                                                      |                                                                          |         |                                                                                                                                         |     |          |         |          |         |          |
|--------------------------------------------------------------------------------------|--------------------------------------------------------------------------|---------|-----------------------------------------------------------------------------------------------------------------------------------------|-----|----------|---------|----------|---------|----------|
|                                                                                      |                                                                          |         | allergens, smoke, exercise or weather                                                                                                   |     |          |         |          |         |          |
| <b>Van Wonderen 2015<sup>3</sup></b>                                                 | Children visiting physician because of cough or wheeze, 2 years (median) | 1 year  | EVW: Wheeze with colds but not between colds, past 12 months. MTW: Wheeze with colds and also between, past 12 months                   |     |          |         |          |         |          |
| Baseline to 12 mo                                                                    |                                                                          |         |                                                                                                                                         | 126 | 50 (40)  | 67 (53) | 9 (7)    | 67 (88) | 9 (12)   |
| Baseline to 24 mo                                                                    |                                                                          |         |                                                                                                                                         | 126 | 86 (68)  | 33 (26) | 7 (6)    | 33 (83) | 7 (17)   |
| <b>Schultz 2009</b>                                                                  | Children diagnosed with asthma, 4 years (median)                         | 1 year  | EVW: Wheezing only during colds and not in the absence of colds. MTW: Wheeze in the absence of colds, irrespective of wheeze with colds | 38  | 13 (34)  | 12 (32) | 13(34)   | 12 (48) | 13(52)   |
| <b>Studies on the stability of MTW (N = number of children with MTW at baseline)</b> |                                                                          |         |                                                                                                                                         |     |          |         |          |         |          |
| <b>Present study</b>                                                                 |                                                                          | 2 years |                                                                                                                                         |     |          |         |          |         |          |
| ALSPAC 2-4 years                                                                     | Population-based cohorts, 2.5 years                                      |         | EVW: Wheeze triggered by infection or bronchitis<br><br>MTW: Wheeze triggered by smoke, weather, allergens, air pollution, other        | 699 | 311 (45) | 73 (10) | 315 (45) | 73 (19) | 315 (81) |
| ALSPAC 4-6 years                                                                     |                                                                          |         |                                                                                                                                         | 616 | 282 (46) | 52 (8)  | 282 (46) | 52 (16) | 282 (84) |
| LRC 2-4 years                                                                        | Population-based cohorts, 2 years                                        |         | EVW: Wheeze during or soon after a cold. MTW: Wheeze without cold and wheeze triggered by exercise, excitement, allergens               | 216 | 97 (45)  | 23 (11) | 96 (44)  | 23 (19) | 96 (81)  |
| LRC 4-6 years                                                                        |                                                                          |         |                                                                                                                                         | 213 | 82 (39)  | 14 (7)  | 117 (55) | 14 (11) | 117 (89) |
| <b>Van Wonderen 2015<sup>3</sup></b>                                                 | Children visiting physician because of cough or                          | 1 year  | EVW: Wheeze with colds but not between colds, past 12 months. MTW: Wheeze with                                                          |     |          |         |          |         |          |

| wheeze, 2 years (median)        |                                                  |        | colds and also between, past 12 months                                                                                                  |    |         |         |         |         |         |
|---------------------------------|--------------------------------------------------|--------|-----------------------------------------------------------------------------------------------------------------------------------------|----|---------|---------|---------|---------|---------|
| Baseline to 12 mo               |                                                  |        |                                                                                                                                         | 49 | 13 (27) | 14 (29) | 22 (45) | 14 (39) | 22 (61) |
| Baseline to 24 mo               |                                                  |        |                                                                                                                                         | 49 | 24 (49) | 14 (29) | 11 (22) | 14 (56) | 11 (44) |
| <b>Schultz 2009<sup>4</sup></b> | Children diagnosed with asthma, 4 years (median) | 1 year | EVW: Wheezing only during colds and not in the absence of colds. MTW: Wheeze in the absence of colds, irrespective of wheeze with colds | 71 | 11 (16) | 22 (31) | 38 (54) | 22 (37) | 38 (63) |

\* Numbers and percentage (parenthesis) of children with no wheeze, EVW, and MTW at follow-up among children with the given baseline phenotype (100%).

† Numbers and percentage (parenthesis) of children with EVW, and MTW at follow-up among children with the given baseline phenotype who continued to wheeze at follow-up (non-wheezers at follow-up excluded).

## References

1. Kappelle L, Brand PL. Severe episodic viral wheeze in preschool children: High risk of asthma at age 5-10 years. *Eur J Pediatr* 2012; 171:947-54.
2. Topal E, Bakirtas A, Yilmaz O, Ertoy Karagol IH, Arga M, Demirsoy MS, et al. Short-term follow-up of episodic wheeze and predictive factors for persistent wheeze. *Allergy Asthma Proc* 2013; 34:e42-6.
3. van Wonderen KE, Geskus RB, van Aalderen WM, Mohrs J, Bindels PJ, van der Mark LB, et al. Stability and predictiveness of multiple trigger and episodic viral wheeze in preschoolers. *Clin Exp Allergy* 2016; 46:837-47.
4. Schultz A, Devadason SG, Savenije OE, Sly PD, Le Souef PN, Brand PL. The transient value of classifying preschool wheeze into episodic viral wheeze and multiple trigger wheeze. *Acta Paediatr* 2010; 99:56-60.
